# Supplementary material
Source: PubMed Central journal article supplement (PMC2262846)

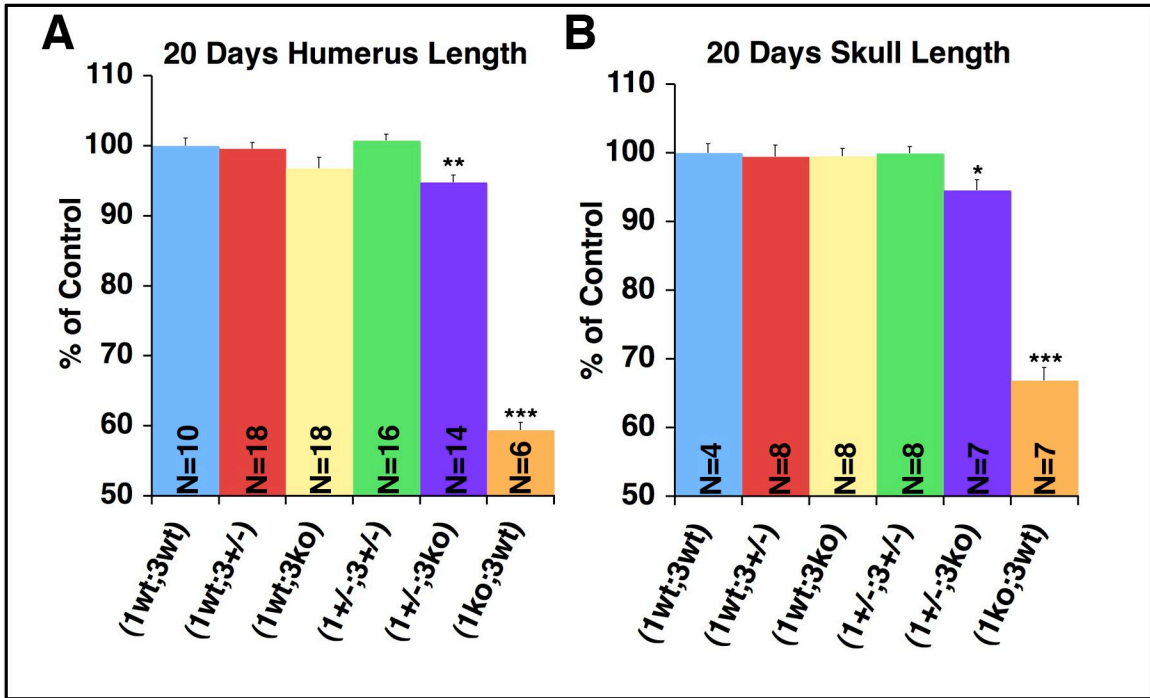

Suppl. Fig. 1.

Supplement: NIHMS37270-supplement-01.pdf [file NIHMS37270-supplement-01.pdf]

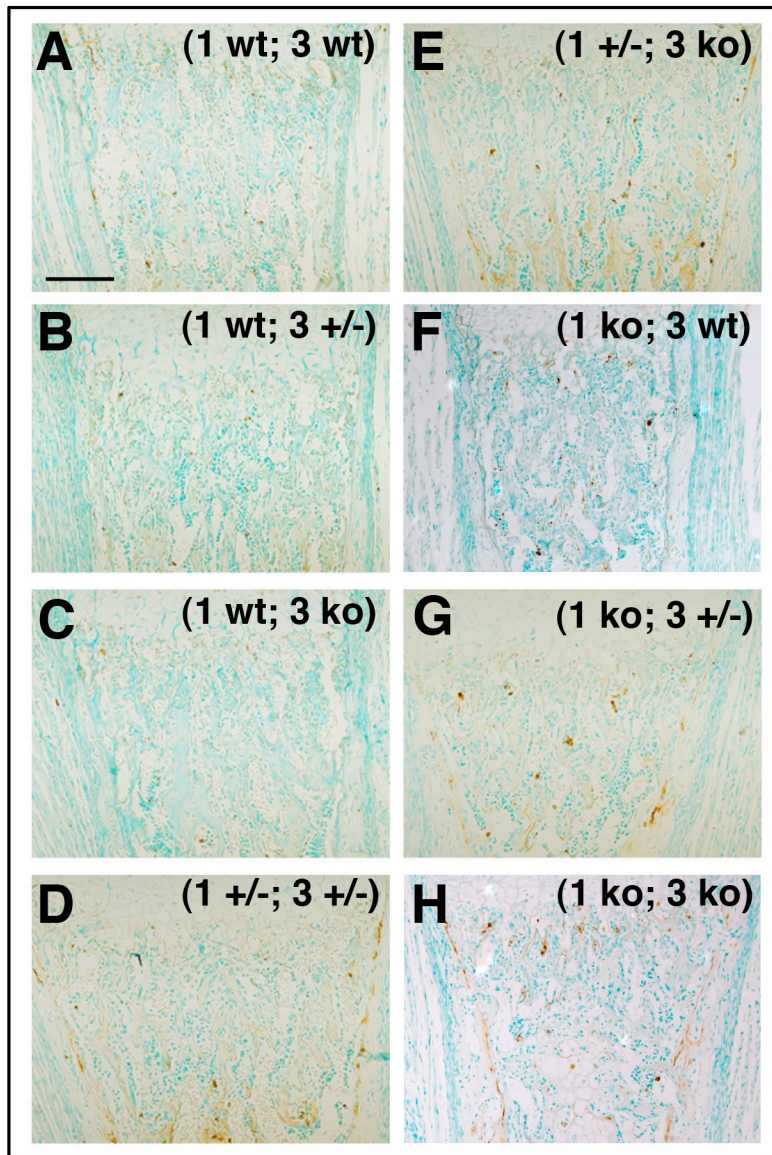

Suppl. Fig. 2.

Supplement: NIHMS37270-supplement-02.pdf [file NIHMS37270-supplement-02.pdf]

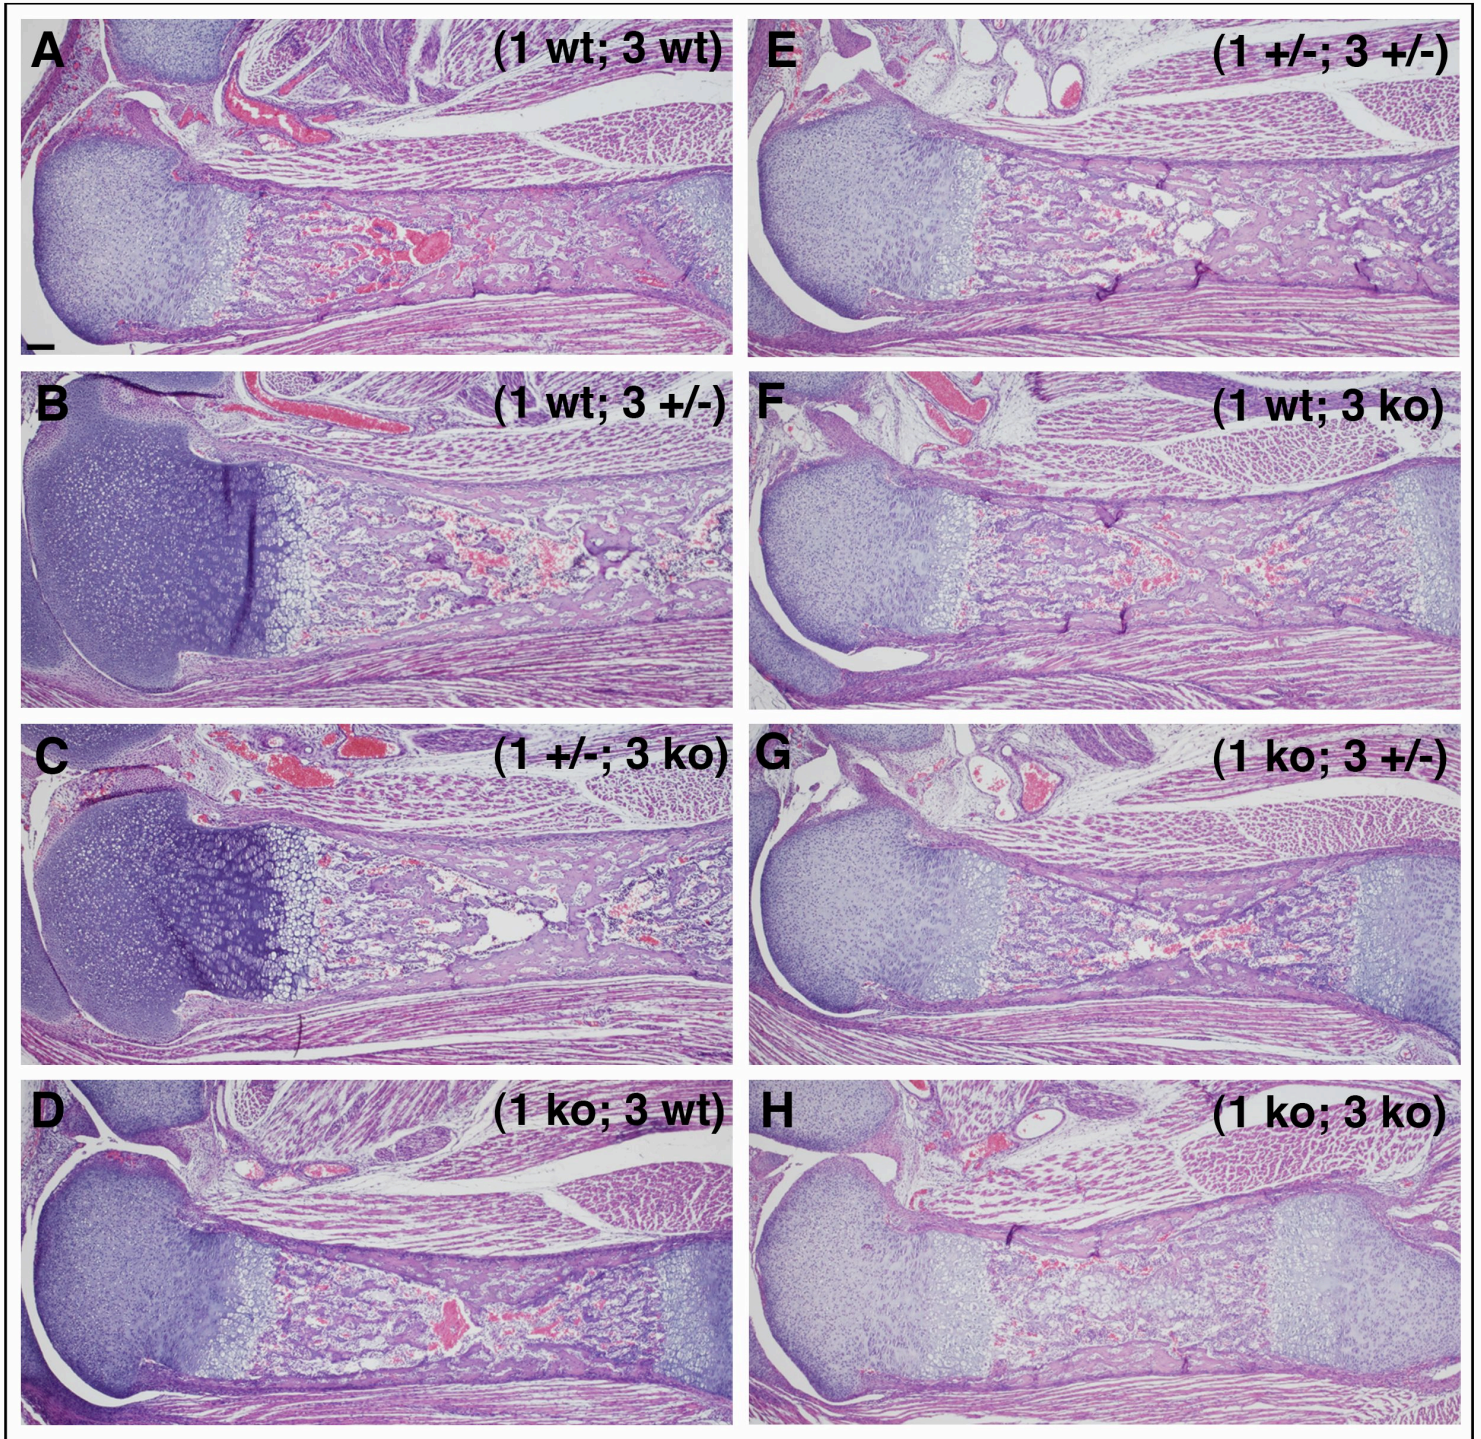

Suppl. Fig. 3.

Supplement: NIHMS37270-supplement-03.pdf [file NIHMS37270-supplement-03.pdf]

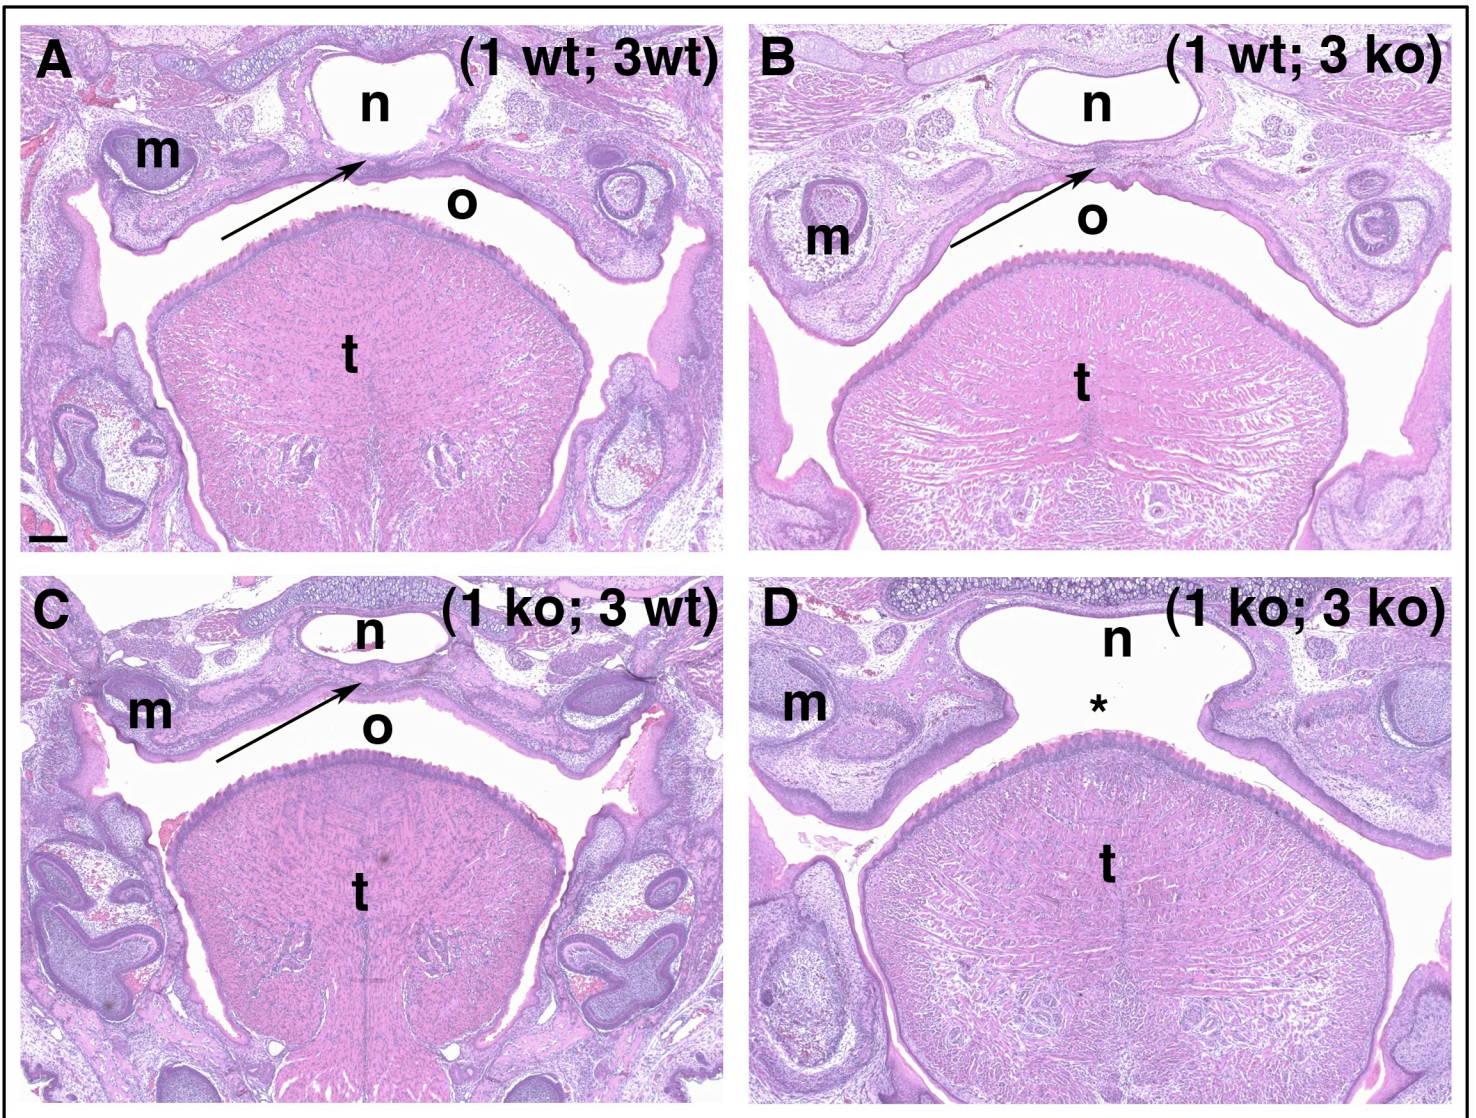

Suppl. Fig. 4.

Supplement: NIHMS37270-supplement-04.pdf [file NIHMS37270-supplement-04.pdf]

# Collagen Type I Matrix

**A**

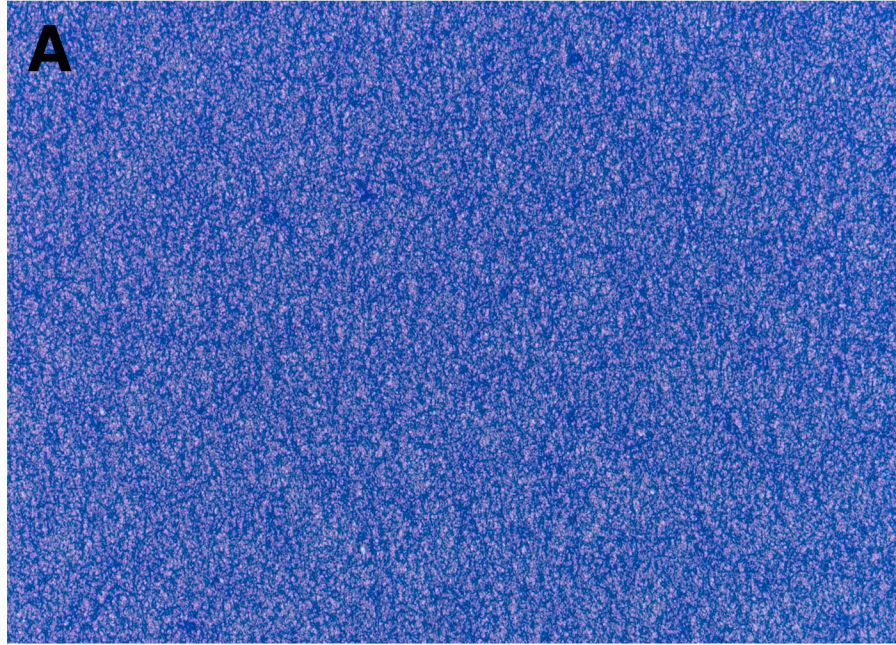

**pCMV $\beta$**

**B**

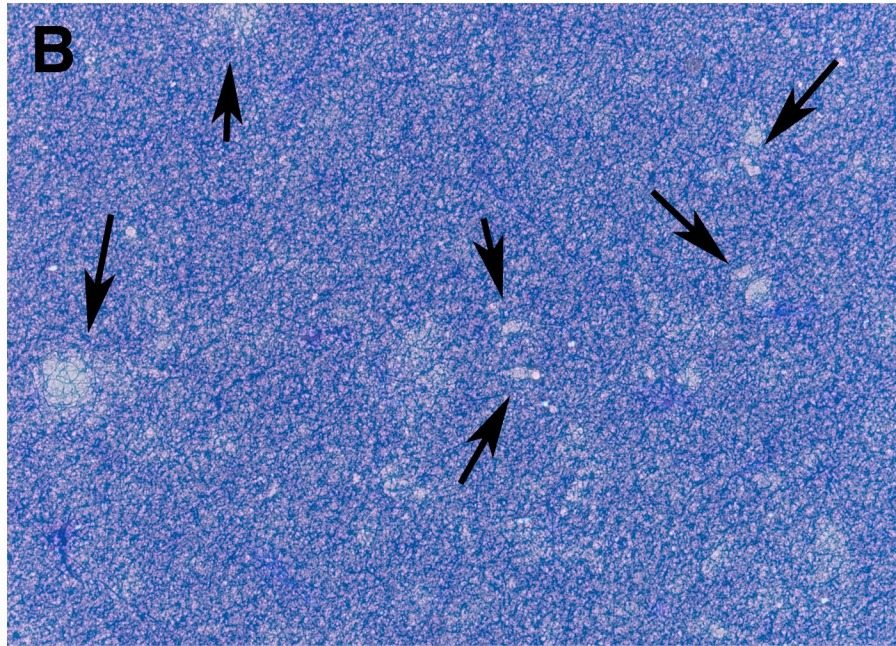

**pCMV-MT3**

Supplement: NIHMS37270-supplement-05.pdf [file NIHMS37270-supplement-05.pdf]
